# Supplementary material
Source: Springer Nature journal article supplement (https://www.springermedizin.de/resource/supplementary/13023_2013_558_MOESM2_ESM.pdf/9642778)

# Supplemental Figure 1

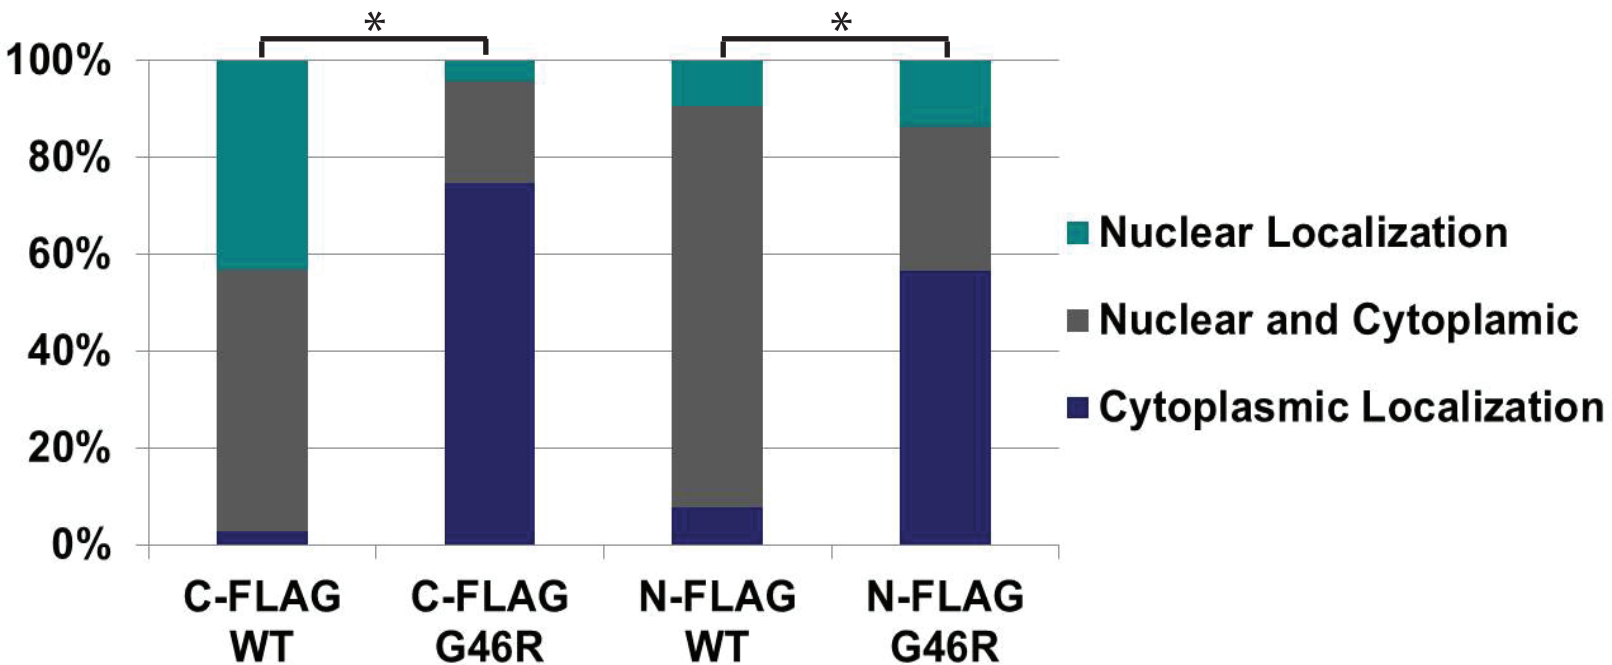

Supplement: MOESM2 [file 9642778]
